# Supplementary material for: Construction of novel hybrid PdO–ZnO p–n heterojunction nanostructures as a high-response sensor for acetaldehyde gas
Source: Royal Society of Chemistry journal article supplement (doi:10.1039/c9ce00710e), 2019-01-01
Supplement: c9ce00710e1.pdf [file c9ce00710e1.pdf]

## SUPPORTING INFORMATION

### **Construction of novel hybrid PdO-ZnO p-n heterojunction nanostructures as high-response sensor for acetaldehyde gas**

Sanjit Manohar Majhi,\* Hu-Jun Lee, Ha-Nui Choi, Ha-Young Cho, Jin-Soo Kim, Cheul-Ro Lee, Yeon-Tae Yu \*

Division of Advanced Materials Engineering and Research Center for Advanced Materials Development, College of Engineering, Chonbuk National University, Jeonju, 561-756, South Korea

\* Corresponding Authors:

E-mail: [yeontae@jbnu.ac.kr](mailto:yeontae@jbnu.ac.kr) (Y. T. Yu), Phone: +82-63-270-2288, Fax: +82-63-270-2305,  
[sanjit.majhi@kaust.edu.sa](mailto:sanjit.majhi@kaust.edu.sa) (S. M. Majhi)

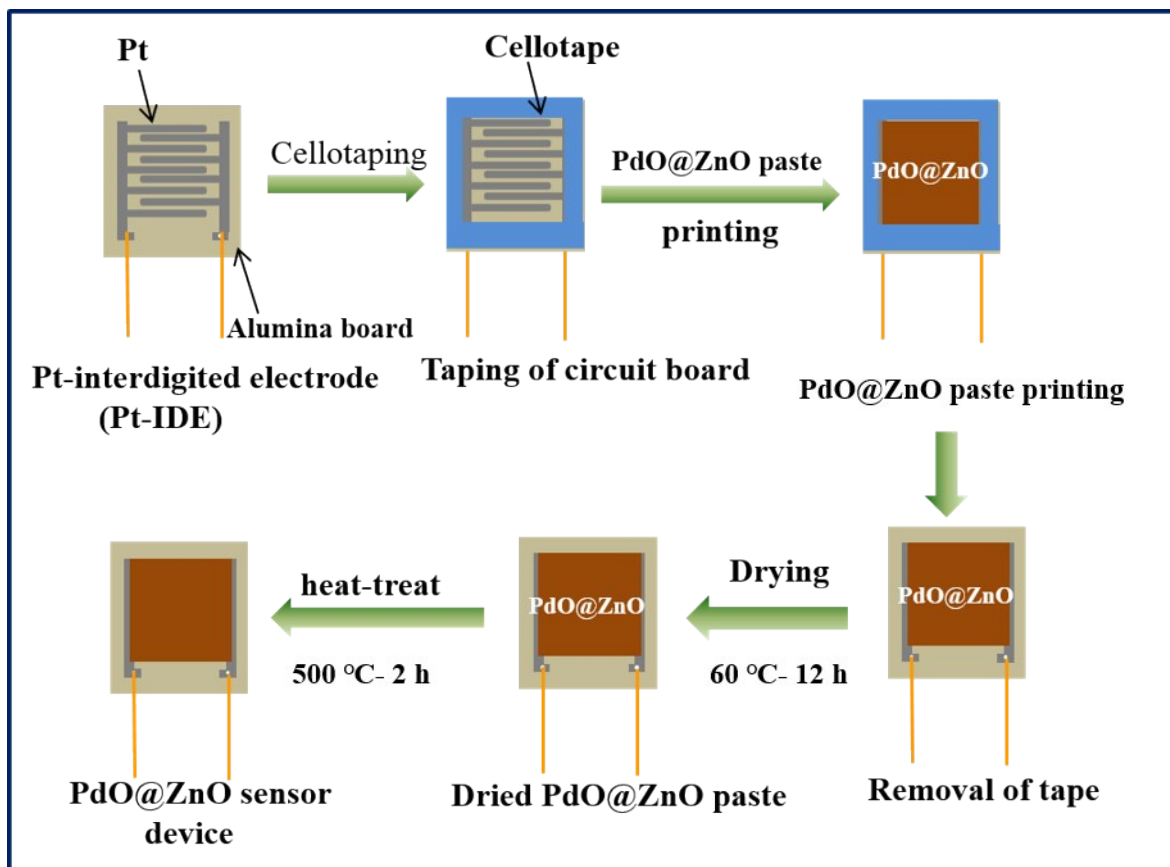

Figure S1. Schematic diagram of preparation of PdO@ZnO p-n heterojunction NSs sensor device.

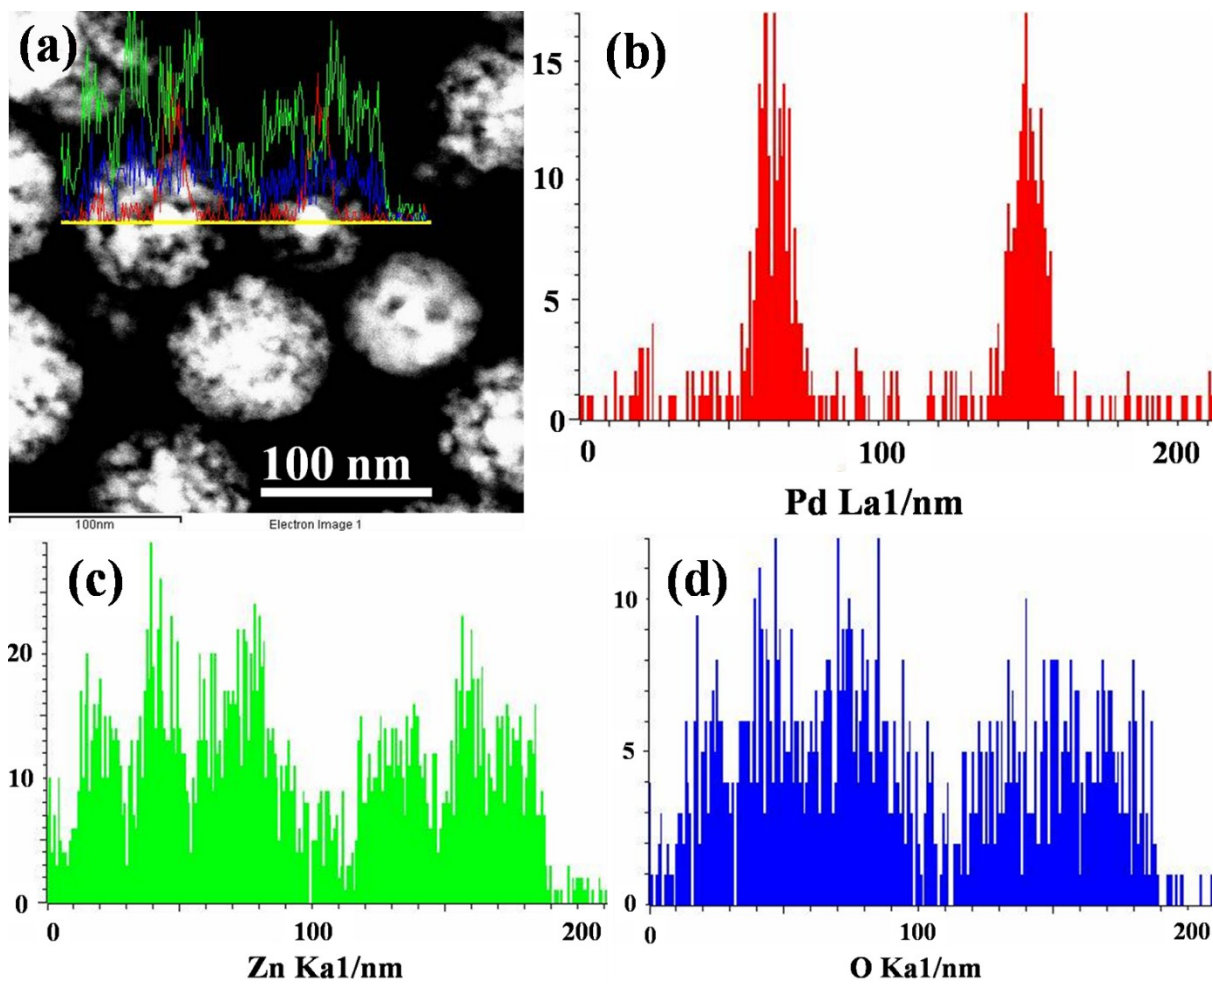

Figure S2. (a) HAADF-STEM line scan images of PdO@ZnO p-n heterojunction NSs showing the intensities of (b) Pd, (c) Zn and (d) O elements.

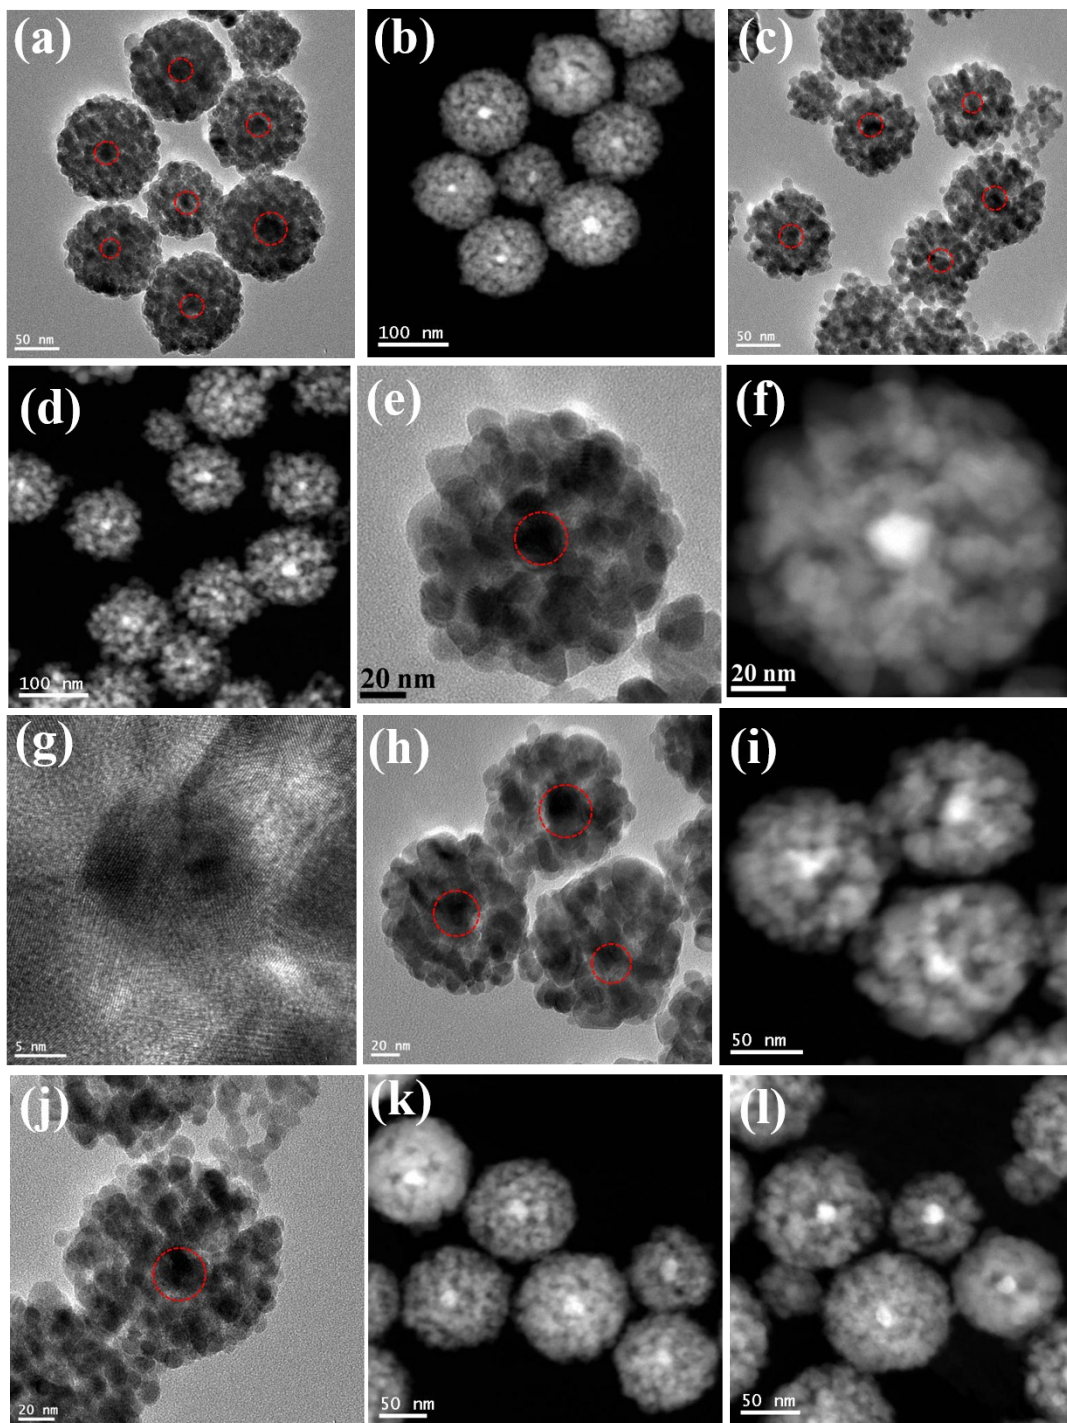

Figure S3. TEM, STEM (a-f), and (h-i), and HRTEM (g) images of PdO@ZnO p-n heterojunction NSs calcined after 500 °C.

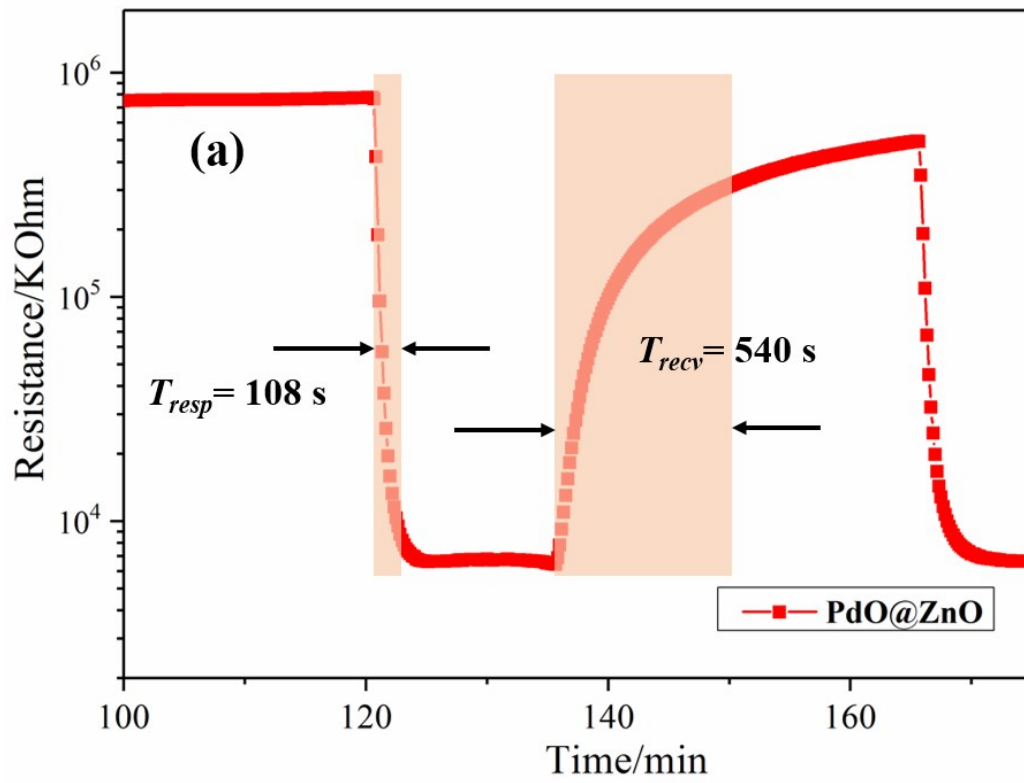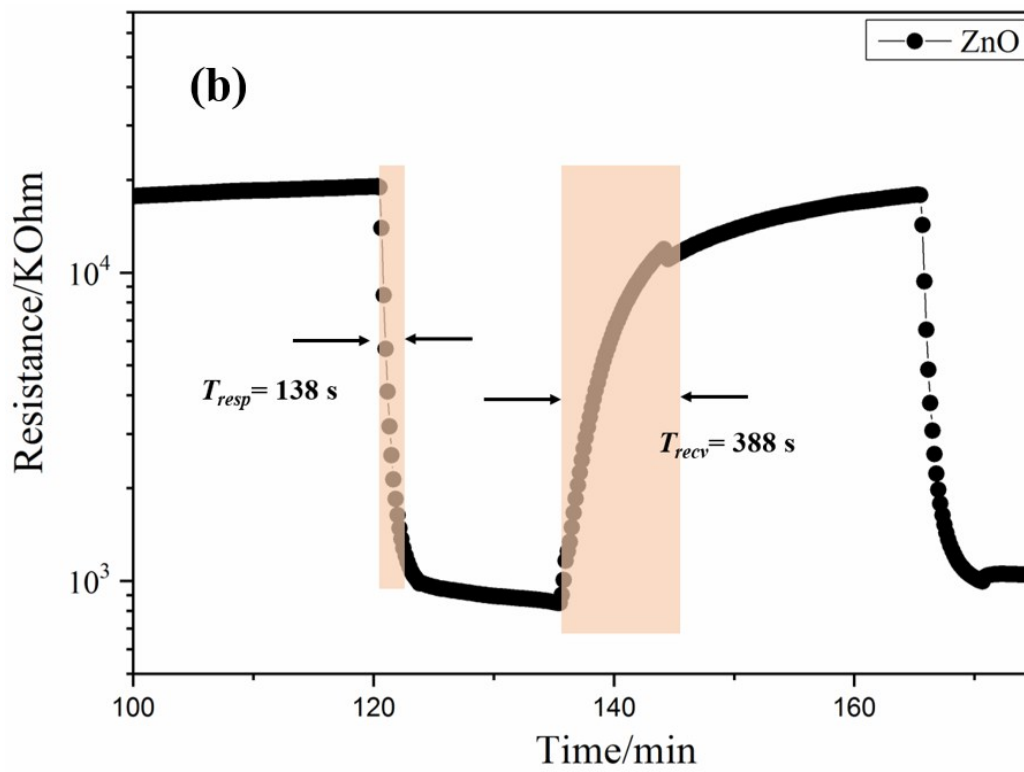

Figure S4. The response, and recovery characteristics of PdO@ZnO p-n heterojunction NSs, (a) and pure ZnO NSs (b) for 100-ppm acetaldehyde at 350 °C.

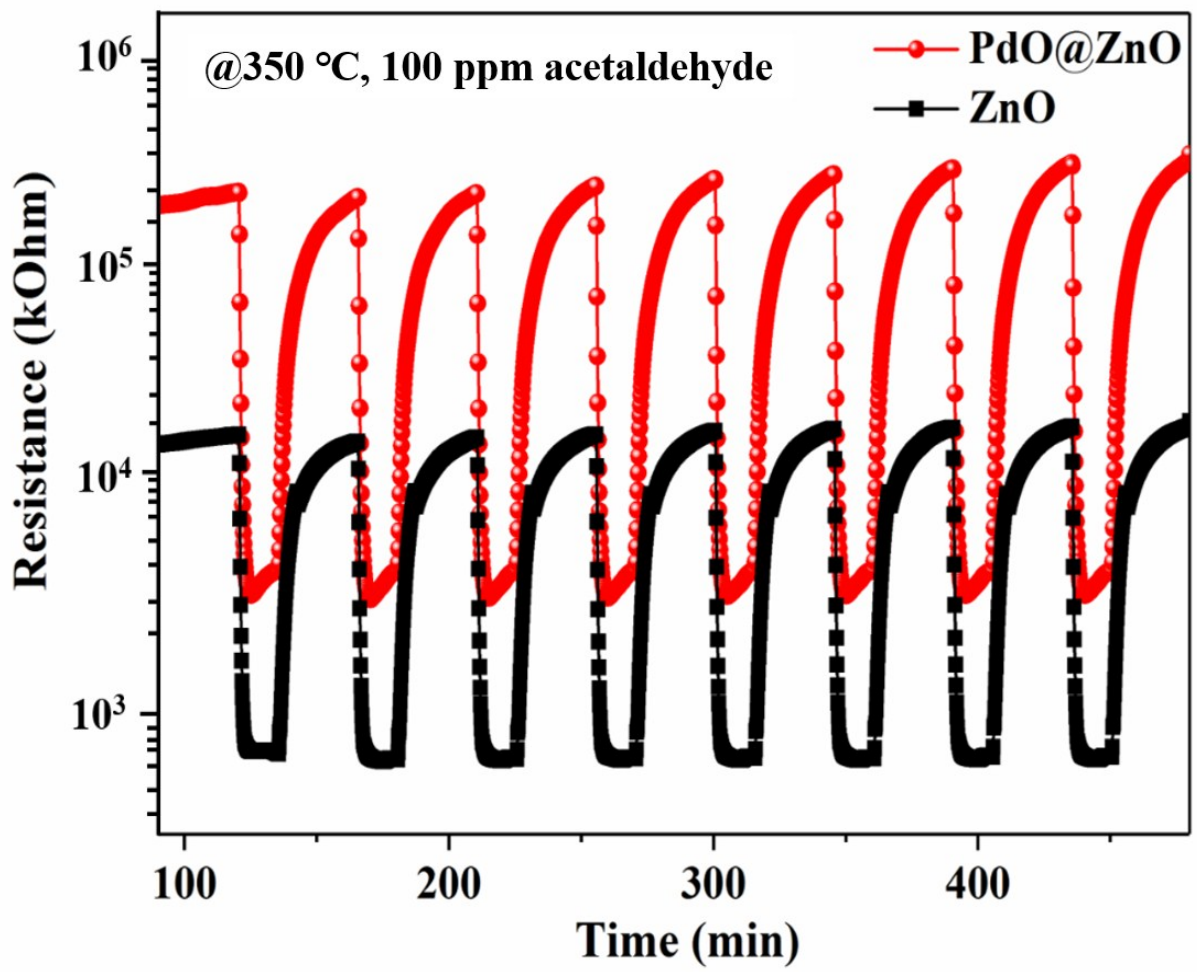

Figure S5. Repeatability test of the ZnO NPs and PdO@ZnO p-n heterojunction NSs sensors at 350 °C for 100 ppm of acetaldehyde.

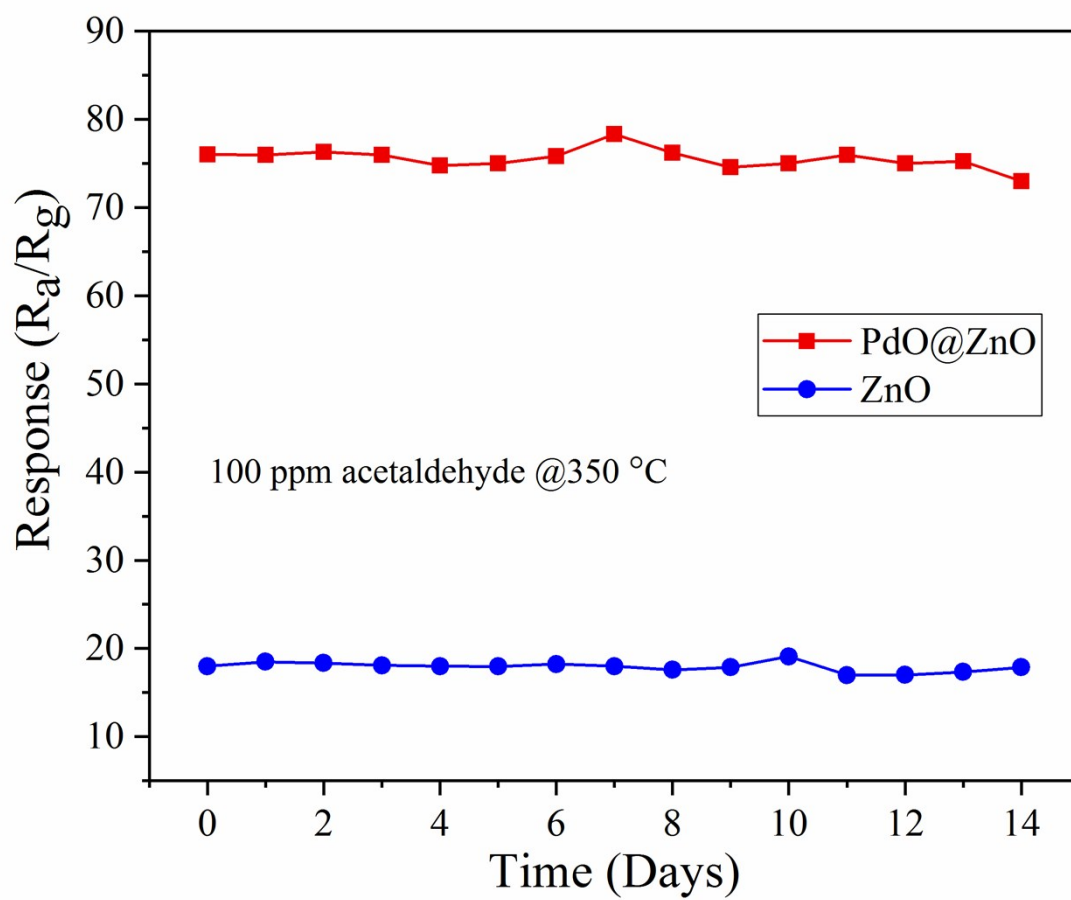

Figure S6. Long-term stability test of the PdO@ZnO p-n heterojunction NSs and ZnO NPs sensors at 350 °C for a period of two weeks.
